# Supplementary material for: Development of a Mobile App to Support Self-management of Anxiety and Depression in African American Women: Usability Study
Source: PubMed Central journal article supplement (PMC8408754; doi:10.2196/24393), 2021-08-17
Supplement: formative_v5i8e24393_app2.pdf [file formative_v5i8e24393_app2.pdf]

## COGNITIVE WALKTHROUGH BENCHMARKS

### Scenario 1 Tasks

| Benchmarks for Tasks                                                                        |                                                                                                                    |             |
|---------------------------------------------------------------------------------------------|--------------------------------------------------------------------------------------------------------------------|-------------|
| Task 1: Find out your levels of anxiety for the past 6 weeks                                |                                                                                                                    |             |
| Steps                                                                                       | Correct Action                                                                                                     | Benchmark   |
| Step 1: Open the app.                                                                       | Tap the <b>TherapyLink</b> icon                                                                                    | X           |
| Step 2: Find the graphs feature.                                                            | Tap the <b>Graphs</b> icon                                                                                         | X           |
| Step 3: Find the anxiety checkup graph.                                                     | Tap the <b>Anxiety Checkup History</b> link                                                                        | X           |
| Step 4: Report your most recent level of anxiety recorded in the graph (severity and date). | Find and report anxiety severity for February 12                                                                   | X           |
| Taps to Complete Task:                                                                      |                                                                                                                    | <b>3</b>    |
| Time to Complete Task (MM:SS):                                                              |                                                                                                                    | <b>0:13</b> |
| Task 2: Find information on how to manage anxiety                                           |                                                                                                                    |             |
| Steps                                                                                       | Correct Action                                                                                                     | Benchmark   |
| Step 1: Find the information feature.                                                       | Use the menu to navigate back to the information feature by tapping the hamburger icon or slide right to show menu | X           |
|                                                                                             | Tap the <b>Back</b> button in the menu                                                                             | X           |
|                                                                                             | Tap the <b>Information</b> link in the menu                                                                        | X           |
| Step 2: Find the anxiety information.                                                       | Tap the <b>Anxiety Info</b> button                                                                                 | X           |
| Step 3: Find the information on how to manage anxiety.                                      | Tap the <b>Managing Anxiety</b> tab                                                                                | X           |
| Step 4: Report the first tip on managing anxiety.                                           | Tap the <b>Tips</b> link and report the first tip                                                                  | X           |
| Taps to Complete Task:                                                                      |                                                                                                                    | <b>6</b>    |
| Time to Complete Task (MM:SS):                                                              |                                                                                                                    | <b>0:25</b> |

| <b>Benchmarks for Tasks</b>                                                                                                 |                                                                                                                                                                                                                                                                                                                       |                  |
|-----------------------------------------------------------------------------------------------------------------------------|-----------------------------------------------------------------------------------------------------------------------------------------------------------------------------------------------------------------------------------------------------------------------------------------------------------------------|------------------|
| <b>Task 3: Add a new entry to your journal</b>                                                                              |                                                                                                                                                                                                                                                                                                                       |                  |
| <b>Steps</b>                                                                                                                | <b>Correct Action</b>                                                                                                                                                                                                                                                                                                 | <b>Benchmark</b> |
| Step 1: Find the journal feature.                                                                                           | Use the menu to navigate back to the information feature by taping the hamburger icon or slide right to show menu                                                                                                                                                                                                     | X                |
|                                                                                                                             | Tap the <b>Back</b> button in the menu                                                                                                                                                                                                                                                                                | X                |
|                                                                                                                             | Tap the <b>Journal</b> link in the menu                                                                                                                                                                                                                                                                               | X                |
| Step 2: Create a new journal entry.                                                                                         | Tap the (+) button to add a new entry                                                                                                                                                                                                                                                                                 | X                |
|                                                                                                                             | Tap in the <b>Title</b> field and enter "Today was a lot"                                                                                                                                                                                                                                                             | X                |
|                                                                                                                             | Tap in the <b>Thoughts</b> field and manually or use the voice-to-text feature to enter, "Today my AP told me that I will be teaching one more section of Algebra in the Spring. I am already overwhelmed with the sections that I have now. I don't know how to tell him that it is going to be too much to manage." | X                |
|                                                                                                                             | Tap the <b>Next</b> button                                                                                                                                                                                                                                                                                            | X                |
| Step 3: Report your feelings.                                                                                               | Tap <b>Pick Items</b> to open the dropdown list of feelings                                                                                                                                                                                                                                                           | X                |
|                                                                                                                             | Tap "anxious" and "overwhelmed" as your options to report your feelings                                                                                                                                                                                                                                               | X                |
|                                                                                                                             | Tap the <b>Save</b> button                                                                                                                                                                                                                                                                                            | X                |
| Step 4: Indicate that there is something you can do to make the situation better, or avoid it from happening in the future. | Tap the <b>Yes</b> button to answer the question, "Is there anything you can do to make the situation better, or avoid it from happening in the future?"                                                                                                                                                              | X                |
| Step 5: Report on what you think can be done to make the situation better.                                                  | Tap in the field to write out your thoughts and manually or use the voice-to-text feature to enter, "I can email the AP to schedule a meeting to discuss my concerns, and propose that other tasks be taken off my plate if I am going to teach one more class."                                                      | X                |
|                                                                                                                             | Tap the <b>Next</b> button                                                                                                                                                                                                                                                                                            | X                |
| Step 6: Save the journal entry.                                                                                             | Review the <b>Journal Entry Summary</b> and tap the <b>Save</b> button                                                                                                                                                                                                                                                | X                |
| Taps to Complete Task:                                                                                                      |                                                                                                                                                                                                                                                                                                                       | <b>15</b>        |
| Time to Complete Task (MM:SS):                                                                                              |                                                                                                                                                                                                                                                                                                                       | <b>3:10</b>      |

| <b>Benchmarks for Tasks</b>                                                                |                                                                                                                   |                  |
|--------------------------------------------------------------------------------------------|-------------------------------------------------------------------------------------------------------------------|------------------|
| <b>Task 4: Locate a therapist to schedule an appointment</b>                               |                                                                                                                   |                  |
| <b>Steps</b>                                                                               | <b>Correct Action</b>                                                                                             | <b>Benchmark</b> |
| Step 1: Find the resources feature                                                         | Use the menu to navigate back to the information feature by taping the hamburger icon or slide right to show menu | X                |
|                                                                                            | Tap the <b>Back</b> button in the menu                                                                            | X                |
|                                                                                            | Tap the <b>Resources</b> link in the menu                                                                         | X                |
| Step 2: Find a therapist in your area from the Therapy for Black Girls Therapist Directory | Tap the <b>Find A Therapist</b> button                                                                            | X                |
|                                                                                            | Tap the <b>Therapy for Black Girls Therapist Directory</b> button                                                 | X                |
|                                                                                            | Tap in the <b>Your Location</b> field and enter zip code “33015”                                                  | X                |
|                                                                                            | Tap the <b>Search</b> button                                                                                      | X                |
|                                                                                            | Scroll down the screen to find “Nakita Charles” and tap the profile                                               | X                |
|                                                                                            | Scroll down the screen and report whether she is accepting new clients                                            | X                |
| Taps to Complete Task:                                                                     |                                                                                                                   | <b>8</b>         |
| Time to Complete Task (MM:SS):                                                             |                                                                                                                   | <b>0:56</b>      |

## Scenario 2 Tasks

| <b>Benchmarks for Tasks</b>                                                                    |                                                                                                                    |             |
|------------------------------------------------------------------------------------------------|--------------------------------------------------------------------------------------------------------------------|-------------|
| <b>Task 1: Find out your levels of depression for the past 6 weeks</b>                         |                                                                                                                    |             |
| Steps                                                                                          | Correct Action                                                                                                     | Benchmark   |
| Step 1: Open the app.                                                                          | Tap the <b>TherapyLink</b> icon                                                                                    | X           |
| Step 2: Find the graphs feature.                                                               | Tap the <b>Graphs</b> icon                                                                                         | X           |
| Step 3: Find the depression checkup graph.                                                     | Tap the <b>Depression Checkup History</b> link                                                                     | X           |
| Step 4: Report your most recent level of depression recorded in the graph (severity and date). | Find and report depression severity for February 12                                                                | X           |
| Taps to Complete Task:                                                                         |                                                                                                                    | <b>3</b>    |
| Time to Complete Task (MM:SS):                                                                 |                                                                                                                    | <b>0:14</b> |
| <b>Task 2: Find information on how to overcome depression</b>                                  |                                                                                                                    |             |
| Steps                                                                                          | Correct Action                                                                                                     | Benchmark   |
| Step 1: Find the information feature.                                                          | Use the menu to navigate back to the information feature by tapping the hamburger icon or slide right to show menu | X           |
|                                                                                                | Tap the <b>Back</b> button in the menu                                                                             | X           |
|                                                                                                | Tap the <b>Information</b> link in the menu                                                                        | X           |
| Step 2: Find the depression information.                                                       | Tap the <b>Depression Info</b> button                                                                              | X           |
| Step 3: Find the information on how to overcome depression.                                    | Tap the <b>Overcome Depression</b> tab                                                                             | X           |
| Step 4: Report the first tip on overcoming depression.                                         | Tap the <b>Tips</b> link and report the first tip                                                                  | X           |
| Taps to Complete Task:                                                                         |                                                                                                                    | <b>6</b>    |
| Time to Complete Task (MM:SS):                                                                 |                                                                                                                    | <b>0:20</b> |

| <b>Benchmarks for Tasks</b>                                                                |                                                                                                                   |                  |
|--------------------------------------------------------------------------------------------|-------------------------------------------------------------------------------------------------------------------|------------------|
| <b>Task 3: Create a self-care plan</b>                                                     |                                                                                                                   |                  |
| <b>Steps</b>                                                                               | <b>Correct Action</b>                                                                                             | <b>Benchmark</b> |
| Step 1: Find the self-care plan feature.                                                   | Use the menu to navigate back to the information feature by taping the hamburger icon or slide right to show menu | X                |
|                                                                                            | Tap the <b>Back</b> button in the menu                                                                            | X                |
|                                                                                            | Tap the <b>Home</b> link in the menu                                                                              | X                |
|                                                                                            | Tap the <b>Self-Care</b> icon                                                                                     | X                |
| Step 2: Create a new self-care plan                                                        | Tap the <b>Create Plan</b> button                                                                                 | X                |
|                                                                                            | Tap the <b>Start Date</b> button                                                                                  | X                |
|                                                                                            | Select "March 23, 2020" from the calendar                                                                         | X                |
|                                                                                            | Tap <b>OK</b>                                                                                                     | X                |
|                                                                                            | Tap the <b>End Date</b> button                                                                                    | X                |
|                                                                                            | Select "March 29, 2020" from the calendar                                                                         | X                |
|                                                                                            | Tap <b>OK</b>                                                                                                     | X                |
|                                                                                            | Tap in the first text entry field and enter "Go to yoga class"                                                    | X                |
|                                                                                            | Tap in the second text entry field and enter "Have lunch with Ashley"                                             | X                |
|                                                                                            | Tap in the third text entry field and enter "Read one chapter of the new book I purchased"                        | X                |
| Step 3: Save the self-care plan.                                                           | Tap the <b>Save</b> button                                                                                        | X                |
| Taps to Complete Task:                                                                     |                                                                                                                   | <b>15</b>        |
| Time to Complete Task (MM:SS):                                                             |                                                                                                                   | <b>1:17</b>      |
| <b>Task 4: Locate a therapist to schedule an appointment</b>                               |                                                                                                                   |                  |
| <b>Steps</b>                                                                               | <b>Correct Action</b>                                                                                             | <b>Benchmark</b> |
| Step 1: Find the resources feature                                                         | Use the menu to navigate back to the information feature by taping the hamburger icon or slide right to show menu | X                |
|                                                                                            | Tap the <b>Back</b> button in the menu                                                                            | X                |
|                                                                                            | Tap the <b>Resources</b> link in the menu                                                                         | X                |
| Step 2: Find a therapist in your area from the Therapy for Black Girls Therapist Directory | Tap the <b>Find A Therapist</b> button                                                                            | X                |
|                                                                                            | Tap the <b>Therapy for Black Grils Therapist Directory</b> button                                                 | X                |
|                                                                                            | Tap in the <b>Your Location</b> field and enter zipcode "28202"                                                   | X                |
|                                                                                            | Tap the <b>Search</b> button                                                                                      | X                |
|                                                                                            | Scroll down the screen to find "Montina Myers-Galloway" and tap the profile                                       | X                |
|                                                                                            | Scroll down the screen and report whether she is accepting new clients                                            | X                |
| Taps to Complete Task:                                                                     |                                                                                                                   | <b>8</b>         |
| Time to Complete Task (MM:SS):                                                             |                                                                                                                   | <b>0:49</b>      |
