# Supplementary material for: Development of a Mobile App to Support Self-management of Anxiety and Depression in African American Women: Usability Study
Source: PubMed Central journal article supplement (PMC8408754; doi:10.2196/24393), 2021-08-17
Supplement: formative_v5i8e24393_app3.pdf [file formative_v5i8e24393_app3.pdf]

**USABILITY TESTING PARTICIPANT PERFORMANCE VS. BENCHMARK FOR SCENARIO 1 TASKS**

| <b>Participant Performance vs Benchmark</b>                                                 |                                                                                                                    |             |             |             |             |             |             |             |             |                  |
|---------------------------------------------------------------------------------------------|--------------------------------------------------------------------------------------------------------------------|-------------|-------------|-------------|-------------|-------------|-------------|-------------|-------------|------------------|
| <b>Task 1: Find out your levels of anxiety for the past 6 weeks</b>                         |                                                                                                                    |             |             |             |             |             |             |             |             |                  |
| <b>Steps</b>                                                                                | <b>Correct Action</b>                                                                                              | <b>P1</b>   | <b>P2</b>   | <b>P3</b>   | <b>P4</b>   | <b>P5</b>   | <b>P6</b>   | <b>P7</b>   | <b>P8</b>   | <b>Benchmark</b> |
| Step 1: Open the app.                                                                       | Tap the <b>TherapyLink</b> icon                                                                                    | X           | X           | X           | X           | X           | X           | X           | X           | X                |
| Step 2: Find the graphs feature.                                                            | Tap the <b>Graphs</b> icon                                                                                         | X           | X           | X           | X           | X           | X           | X           | X           | X                |
| Step 3: Find the anxiety checkup graph.                                                     | Tap the <b>Anxiety Checkup History</b> link                                                                        | X           | X           | X           | X           | X           | X           | X           | X           | X                |
| Step 4: Report your most recent level of anxiety recorded in the graph (severity and date). | Find and report anxiety severity for February 12                                                                   | X           | X           | X           | X           | X           | X           | X           | X           | X                |
| Taps to Complete Task:                                                                      |                                                                                                                    | <b>3</b>    | <b>3</b>    | <b>3</b>    | <b>3</b>    | <b>3</b>    | <b>3</b>    | <b>3</b>    | <b>6</b>    | <b>3</b>         |
| Time to Complete Task (MM:SS):                                                              |                                                                                                                    | <b>0:20</b> | <b>0:56</b> | <b>1:41</b> | <b>0:58</b> | <b>1:13</b> | <b>0:26</b> | <b>0:36</b> | <b>1:40</b> | <b>0:13</b>      |
| <b>Task 2: Find information on how to manage anxiety</b>                                    |                                                                                                                    |             |             |             |             |             |             |             |             |                  |
| <b>Steps</b>                                                                                | <b>Correct Action</b>                                                                                              | <b>P1</b>   | <b>P2</b>   | <b>P3</b>   | <b>P4</b>   | <b>P5</b>   | <b>P6</b>   | <b>P7</b>   | <b>P8</b>   | <b>Benchmark</b> |
| Step 1: Find the information feature.                                                       | Use the menu to navigate back to the information feature by tapping the hamburger icon or slide right to show menu | X           | X           |             | X           | X           | X           |             | X           | X                |
|                                                                                             | Tap the <b>Back</b> button in the menu                                                                             | X           | X           |             | X           | X           | X           |             | X           | X                |
|                                                                                             | Tap the <b>Information</b> link in the menu                                                                        | X           | X           |             |             | X           | X           |             | X           | X                |
| Step 2: Find the anxiety information.                                                       | Tap the <b>Anxiety Info</b> button                                                                                 | X           | X           | X           | X           | X           | X           | X           | X           | X                |
| Step 3: Find the information on how to manage anxiety.                                      | Tap the <b>Managing Anxiety</b> tab                                                                                | X           | X           | X           | X           | X           | X           | X           | X           | X                |
| Step 4: Report the first tip on managing anxiety.                                           | Tap the <b>Tips</b> link and report the first tip                                                                  | X           | X           | X           | X           | X           | X           | X           | X           | X                |
| Taps to Complete Task:                                                                      |                                                                                                                    | <b>6</b>    | <b>14</b>   | <b>6</b>    | <b>18</b>   | <b>6</b>    | <b>37</b>   | <b>6</b>    | <b>12</b>   | <b>6</b>         |
| Time to Complete Task (MM:SS):                                                              |                                                                                                                    | <b>0:48</b> | <b>1:43</b> | <b>1:09</b> | <b>1:50</b> | <b>1:15</b> | <b>4:24</b> | <b>0:53</b> | <b>2:03</b> | <b>0:25</b>      |

| Participant Performance vs Benchmark                                                                                        |                                                                                                                                                                                                                                                                                                                       |      |      |      |      |      |       |       |       |           |   |
|-----------------------------------------------------------------------------------------------------------------------------|-----------------------------------------------------------------------------------------------------------------------------------------------------------------------------------------------------------------------------------------------------------------------------------------------------------------------|------|------|------|------|------|-------|-------|-------|-----------|---|
| Task 3: Add a new entry to your journal                                                                                     |                                                                                                                                                                                                                                                                                                                       |      |      |      |      |      |       |       |       |           |   |
| Steps                                                                                                                       | Correct Action                                                                                                                                                                                                                                                                                                        | P1   | P2   | P3   | P4   | P5   | P6    | P7    | P8    | Benchmark |   |
| Step 1: Find the journal feature.                                                                                           | Use the menu to navigate back to the information feature by taping the hamburger icon or slide right to show menu                                                                                                                                                                                                     | X    | X    |      | X    | X    |       |       | X     | X         |   |
|                                                                                                                             | Tap the <b>Back</b> button in the menu                                                                                                                                                                                                                                                                                | X    | X    |      | X    | X    |       |       | X     | X         |   |
|                                                                                                                             | Tap the <b>Journal</b> link in the menu                                                                                                                                                                                                                                                                               | X    | X    |      |      | X    |       |       | X     | X         |   |
| Step 2: Create a new journal entry.                                                                                         | Tap the (+) button to add a new entry                                                                                                                                                                                                                                                                                 | X    | X    | X    | X    | X    | X     | X     | X     | X         |   |
|                                                                                                                             | Tap in the <b>Title</b> field and enter "Today was a lot"                                                                                                                                                                                                                                                             | X    | X    | X    | X    | X    | X     | X     | X     | X         |   |
|                                                                                                                             | Tap in the <b>Thoughts</b> field and manually or use the voice-to-text feature to enter, "Today my AP told me that I will be teaching one more section of Algebra in the Spring. I am already overwhelmed with the sections that I have now. I don't know how to tell him that it is going to be too much to manage." | X    | X    | X    | X    | X    | X     | X     | X     | X         | X |
|                                                                                                                             | Tap the <b>Next</b> button                                                                                                                                                                                                                                                                                            | X    | X    | X    | X    | X    | X     | X     | X     | X         |   |
| Step 3: Report your feelings.                                                                                               | Tap <b>Pick Items</b> to open the dropdown list of feelings                                                                                                                                                                                                                                                           | X    | X    | X    | X    | X    | X     |       | X     | X         |   |
|                                                                                                                             | Tap "anxious" and "overwhelmed" as your options to report your feelings                                                                                                                                                                                                                                               | X    | X    | X    | X    | X    | X     |       | X     | X         |   |
|                                                                                                                             | Tap the <b>Save</b> button                                                                                                                                                                                                                                                                                            | X    | X    | X    | X    | X    | X     | X     | X     | X         |   |
| Step 4: Indicate that there is something you can do to make the situation better, or avoid it from happening in the future. | Tap the <b>Yes</b> button to answer the question, "Is there anything you can do to make the situation better, or avoid it from happening in the future?"                                                                                                                                                              | X    | X    | X    | X    | X    | X     |       |       | X         |   |
| Step 5: Report on what you think can be done to make the situation better.                                                  | Tap in the field to write out your thoughts and manually or use the voice-to-text feature to enter, "I can email the AP to schedule a meeting to discuss my concerns, and propose that other tasks be taken off my plate if I am going to teach one more class."                                                      | X    | X    | X    | X    | X    |       |       |       | X         |   |
|                                                                                                                             | Tap the <b>Next</b> button                                                                                                                                                                                                                                                                                            | X    | X    | X    | X    | X    | X     |       |       | X         |   |
| Step 6: Save the journal entry.                                                                                             | Review the <b>Journal Entry Summary</b> and tap the <b>Save</b> button                                                                                                                                                                                                                                                | X    | X    | X    | X    | X    |       |       | X     | X         |   |
| Taps to Complete Task:                                                                                                      |                                                                                                                                                                                                                                                                                                                       | 17   | 18   | 18   | 17   | 19   | 15*   | 9*    | 13*   | 15        |   |
| Time to Complete Task (MM:SS):                                                                                              |                                                                                                                                                                                                                                                                                                                       | 4:07 | 2:48 | 6:10 | 3:23 | 4:50 | 4:23* | 4:17* | 3:10* | 3:10      |   |

\*Participant was unable to fully complete task.

| Participant Performance vs Benchmark                                                       |                                                                                                                    |      |      |      |      |      |      |      |      |           |
|--------------------------------------------------------------------------------------------|--------------------------------------------------------------------------------------------------------------------|------|------|------|------|------|------|------|------|-----------|
| Task 4: Locate a therapist to schedule an appointment                                      |                                                                                                                    |      |      |      |      |      |      |      |      |           |
| Steps                                                                                      | Correct Action                                                                                                     | P1   | P2   | P3   | P4   | P5   | P6   | P7   | P8   | Benchmark |
| Step 1: Find the resources feature                                                         | Use the menu to navigate back to the information feature by tapping the hamburger icon or slide right to show menu | X    | X    | X    | X    | X    |      |      | X    | X         |
|                                                                                            | Tap the <b>Back</b> button in the menu                                                                             | X    | X    | X    | X    | X    |      |      | X    | X         |
|                                                                                            | Tap the <b>Resources</b> link in the menu                                                                          | X    | X    |      |      | X    |      |      |      | X         |
| Step 2: Find a therapist in your area from the Therapy for Black Girls Therapist Directory | Tap the <b>Find A Therapist</b> button                                                                             | X    | X    | X    | X    | X    | X    | X    | X    | X         |
|                                                                                            | Tap the <b>Therapy for Black Girls Therapist Directory</b> button                                                  | X    | X    | X    | X    | X    | X    | X    | X    | X         |
|                                                                                            | Tap in the <b>Your Location</b> field and enter zip code “33015”                                                   | X    | X    | X    |      | X    | X    | X    | X    | X         |
|                                                                                            | Tap the <b>Search</b> button                                                                                       | X    | X    | X    | X    | X    | X    | X    | X    | X         |
|                                                                                            | Scroll down the screen to find “Nakita Charles” and tap the profile                                                | X    | X    | X    | X    | X    | X    | X    | X    | X         |
|                                                                                            | Scroll down the screen and report whether she is accepting new clients                                             | X    | X    | X    | X    | X    | X    | X    | X    | X         |
| Taps to Complete Task:                                                                     |                                                                                                                    | 10   | 15   | 11   | 35   | 11   | 13   | 10   | 14   | 8         |
| Time to Complete Task (MM:SS):                                                             |                                                                                                                    | 2:04 | 1:42 | 2:10 | 3:21 | 1:43 | 2:13 | 1:46 | 3:14 | 0:56      |
