# Supplementary material for: Development of a Mobile App to Support Self-management of Anxiety and Depression in African American Women: Usability Study
Source: PubMed Central journal article supplement (PMC8408754; doi:10.2196/24393), 2021-08-17
Supplement: formative_v5i8e24393_app4.pdf [file formative_v5i8e24393_app4.pdf]

**USABILITY TESTING PARTICIPANT PERFORMANCE VS. BENCHMARK FOR SCENARIO 2 TASKS**

| <b>Participant Performance vs Benchmark</b>                                                    |                                                                                                                    |             |             |             |             |             |             |             |                  |
|------------------------------------------------------------------------------------------------|--------------------------------------------------------------------------------------------------------------------|-------------|-------------|-------------|-------------|-------------|-------------|-------------|------------------|
| <b>Task 1: Find out your levels of depression for the past 6 weeks</b>                         |                                                                                                                    |             |             |             |             |             |             |             |                  |
| <b>Steps</b>                                                                                   | <b>Correct Action</b>                                                                                              | <b>P9</b>   | <b>P10</b>  | <b>P11</b>  | <b>P12</b>  | <b>P13</b>  | <b>P14</b>  | <b>P15</b>  | <b>Benchmark</b> |
| Step 1: Open the app.                                                                          | Tap the <b>TherapyLink</b> icon                                                                                    | X           | X           | X           | X           | X           | X           | X           | X                |
| Step 2: Find the graphs feature.                                                               | Tap the <b>Graphs</b> icon                                                                                         | X           | X           | X           | X           | X           | X           | X           | X                |
| Step 3: Find the depression checkup graph.                                                     | Tap the <b>Depression Checkup History</b> link                                                                     | X           | X           | X           | X           | X           | X           | X           | X                |
| Step 4: Report your most recent level of depression recorded in the graph (severity and date). | Find and report depression severity for February 12                                                                | X           | X           | X           | X           | X           | X           | X           | X                |
| Taps to Complete Task:                                                                         |                                                                                                                    | <b>3</b>    | <b>3</b>    | <b>5</b>    | <b>3</b>    | <b>3</b>    | <b>3</b>    | <b>6</b>    | <b>3</b>         |
| Time to Complete Task (MM:SS):                                                                 |                                                                                                                    | <b>0:48</b> | <b>0:27</b> | <b>0:37</b> | <b>0:31</b> | <b>0:30</b> | <b>0:37</b> | <b>0:44</b> | <b>0:14</b>      |
| <b>Task 2: Find information on how to overcome depression</b>                                  |                                                                                                                    |             |             |             |             |             |             |             |                  |
| <b>Steps</b>                                                                                   | <b>Correct Action</b>                                                                                              | <b>P9</b>   | <b>P10</b>  | <b>P11</b>  | <b>P12</b>  | <b>P13</b>  | <b>P14</b>  | <b>P15</b>  | <b>Benchmark</b> |
| Step 1: Find the information feature.                                                          | Use the menu to navigate back to the information feature by tapping the hamburger icon or slide right to show menu |             |             |             |             | X           | X           | X           | X                |
|                                                                                                | Tap the <b>Back</b> button in the menu                                                                             |             |             |             |             | X           | X           | X           | X                |
|                                                                                                | Tap the <b>Information</b> link in the menu                                                                        |             |             |             |             | X           | X           | X           | X                |
| Step 2: Find the depression information.                                                       | Tap the <b>Depression Info</b> button                                                                              | X           | X           | X           | X           | X           | X           | X           | X                |
| Step 3: Find the information on how to overcome depression.                                    | Tap the <b>Overcome Depression</b> tab                                                                             | X           | X           | X           | X           | X           | X           | X           | X                |
| Step 4: Report the first tip on overcoming depression.                                         | Tap the <b>Tips</b> link and report the first tip                                                                  | X           | X           | X           | X           | X           | X           | X           | X                |
| Taps to Complete Task:                                                                         |                                                                                                                    | <b>14</b>   | <b>12</b>   | <b>6</b>    | <b>9</b>    | <b>6</b>    | <b>6</b>    | <b>11</b>   | <b>6</b>         |
| Time to Complete Task (MM:SS):                                                                 |                                                                                                                    | <b>1:38</b> | <b>2:14</b> | <b>0:28</b> | <b>1:50</b> | <b>0:45</b> | <b>1:24</b> | <b>1:11</b> | <b>0:20</b>      |

| Participant Performance vs Benchmark     |                                                                                                                    |             |             |             |             |             |             |             |             |
|------------------------------------------|--------------------------------------------------------------------------------------------------------------------|-------------|-------------|-------------|-------------|-------------|-------------|-------------|-------------|
| Task 3: Create a self-care plan          |                                                                                                                    |             |             |             |             |             |             |             |             |
| Steps                                    | Correct Action                                                                                                     | P9          | P10         | P11         | P12         | P13         | P14         | P15         | Benchmark   |
| Step 1: Find the self-care plan feature. | Use the menu to navigate back to the information feature by tapping the hamburger icon or slide right to show menu |             |             |             |             | X           | X           |             | X           |
|                                          | Tap the <b>Back</b> button in the menu                                                                             |             |             |             |             | X           | X           |             | X           |
|                                          | Tap the <b>Home</b> link in the menu                                                                               |             |             |             |             | X           | X           |             | X           |
|                                          | Tap the <b>Self-Care</b> icon                                                                                      | X           | X           | X           | X           | X           | X           | X           | X           |
| Step 2: Create a new self-care plan      | Tap the <b>Create Plan</b> button                                                                                  | X           | X           | X           | X           | X           | X           | X           | X           |
|                                          | Tap the <b>Start Date</b> button                                                                                   | X           | X           | X           | X           | X           | X           | X           | X           |
|                                          | Select "March 23, 2020" from the calendar                                                                          | X           | X           | X           | X           | X           | X           | X           | X           |
|                                          | Tap <b>OK</b>                                                                                                      | X           | X           | X           | X           | X           | X           | X           | X           |
|                                          | Tap the <b>End Date</b> button                                                                                     | X           | X           | X           | X           | X           | X           | X           | X           |
|                                          | Select "March 29, 2020" from the calendar                                                                          | X           | X           | X           | X           | X           | X           | X           | X           |
|                                          | Tap <b>OK</b>                                                                                                      | X           | X           | X           | X           | X           | X           | X           | X           |
|                                          | Tap in the first text entry field and enter "Go to yoga class"                                                     | X           | X           | X           | X           | X           | X           | X           | X           |
|                                          | Tap in the second text entry field and enter "Have lunch with Ashley"                                              | X           | X           | X           | X           | X           | X           | X           | X           |
|                                          | Tap in the third text entry field and enter "Read one chapter of the new book I purchased"                         | X           | X           | X           | X           | X           | X           | X           | X           |
| Step 3: Save the self-care plan.         | Tap the <b>Save</b> button                                                                                         | X           | X           | X           | X           | X           | X           | X           | X           |
| Taps to Complete Task:                   |                                                                                                                    | <b>21</b>   | <b>23</b>   | <b>19</b>   | <b>21</b>   | <b>21</b>   | <b>17</b>   | <b>16</b>   | <b>15</b>   |
| Time to Complete Task (MM:SS):           |                                                                                                                    | <b>2:08</b> | <b>1:57</b> | <b>1:27</b> | <b>1:42</b> | <b>2:47</b> | <b>2:08</b> | <b>1:17</b> | <b>1:17</b> |

| Participant Performance vs Benchmark                                                       |                                                                                                                    |             |             |             |             |             |             |             |             |
|--------------------------------------------------------------------------------------------|--------------------------------------------------------------------------------------------------------------------|-------------|-------------|-------------|-------------|-------------|-------------|-------------|-------------|
| Task 4: Locate a therapist to schedule an appointment                                      |                                                                                                                    |             |             |             |             |             |             |             |             |
| Steps                                                                                      | Correct Action                                                                                                     | P9          | P10         | P11         | P12         | P13         | P14         | P15         | Benchmark   |
| Step 1: Find the resources feature                                                         | Use the menu to navigate back to the information feature by tapping the hamburger icon or slide right to show menu |             |             |             | X           | X           | X           |             | X           |
|                                                                                            | Tap the <b>Back</b> button in the menu                                                                             |             |             |             | X           | X           | X           |             | X           |
|                                                                                            | Tap the <b>Resources</b> link in the menu                                                                          |             |             |             |             | X           | X           |             | X           |
| Step 2: Find a therapist in your area from the Therapy for Black Girls Therapist Directory | Tap the <b>Find A Therapist</b> button                                                                             | X           | X           | X           | X           | X           | X           | X           | X           |
|                                                                                            | Tap the <b>Therapy for Black Grils Therapist Directory</b> button                                                  | X           | X           | X           | X           | X           | X           | X           | X           |
|                                                                                            | Tap in the <b>Your Location</b> field and enter zipcode “28202”                                                    | X           | X           | X           | X           | X           | X           | X           | X           |
|                                                                                            | Tap the <b>Search</b> button                                                                                       | X           | X           | X           | X           | X           | X           | X           | X           |
|                                                                                            | Scroll down the screen to find “Montina Myers-Galloway” and tap the profile                                        | X           | X           | X           | X           | X           | X           | X           | X           |
|                                                                                            | Scroll down the screen and report whether she is accepting new clients                                             | X           | X           | X           | X           | X           | X           | X           | X           |
| Taps to Complete Task:                                                                     |                                                                                                                    | <b>9</b>    | <b>13</b>   | <b>7</b>    | <b>9</b>    | <b>9</b>    | <b>9</b>    | <b>11</b>   | <b>8</b>    |
| Time to Complete Task (MM:SS):                                                             |                                                                                                                    | <b>1:24</b> | <b>2:09</b> | <b>1:07</b> | <b>1:26</b> | <b>1:22</b> | <b>1:55</b> | <b>1:30</b> | <b>0:49</b> |
